# Supplementary material for: Respiratory mucosal immune memory to SARS-CoV-2 after infection and vaccination
Source: PubMed Central journal article supplement (PMC10603102; doi:10.1038/s41467-023-42433-w), 2023-10-26
Supplement: 41467_2023_42433_MOESM1_ESM.pdf [file 41467_2023_42433_MOESM1_ESM.pdf]

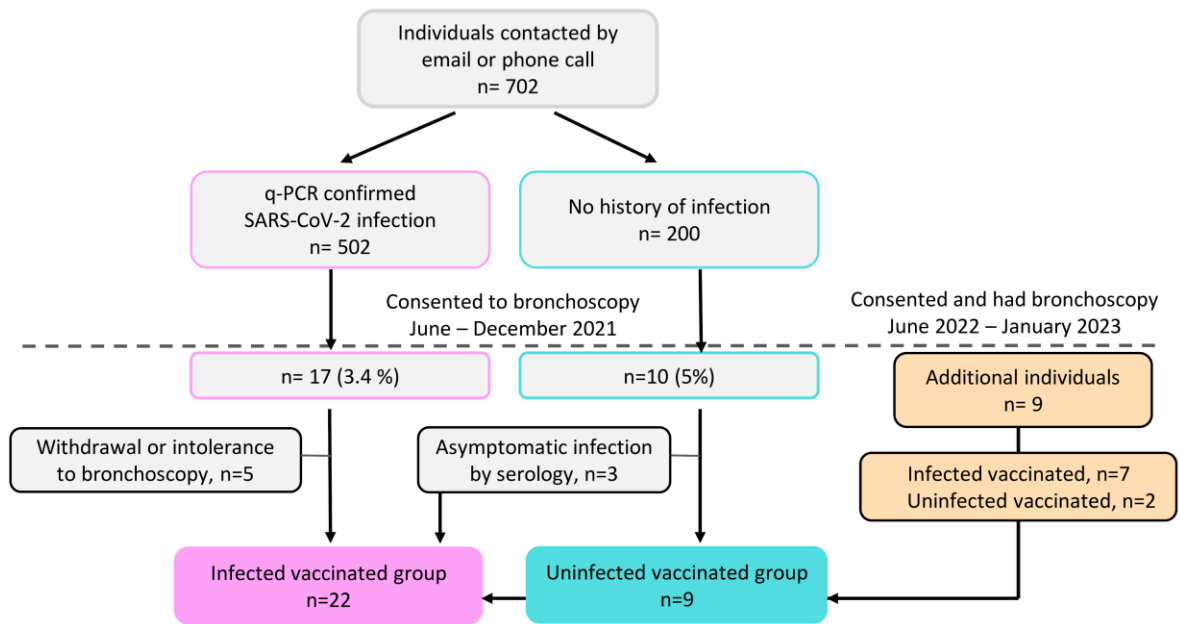

**Supplemental Figure 1. Cohort flow chart**

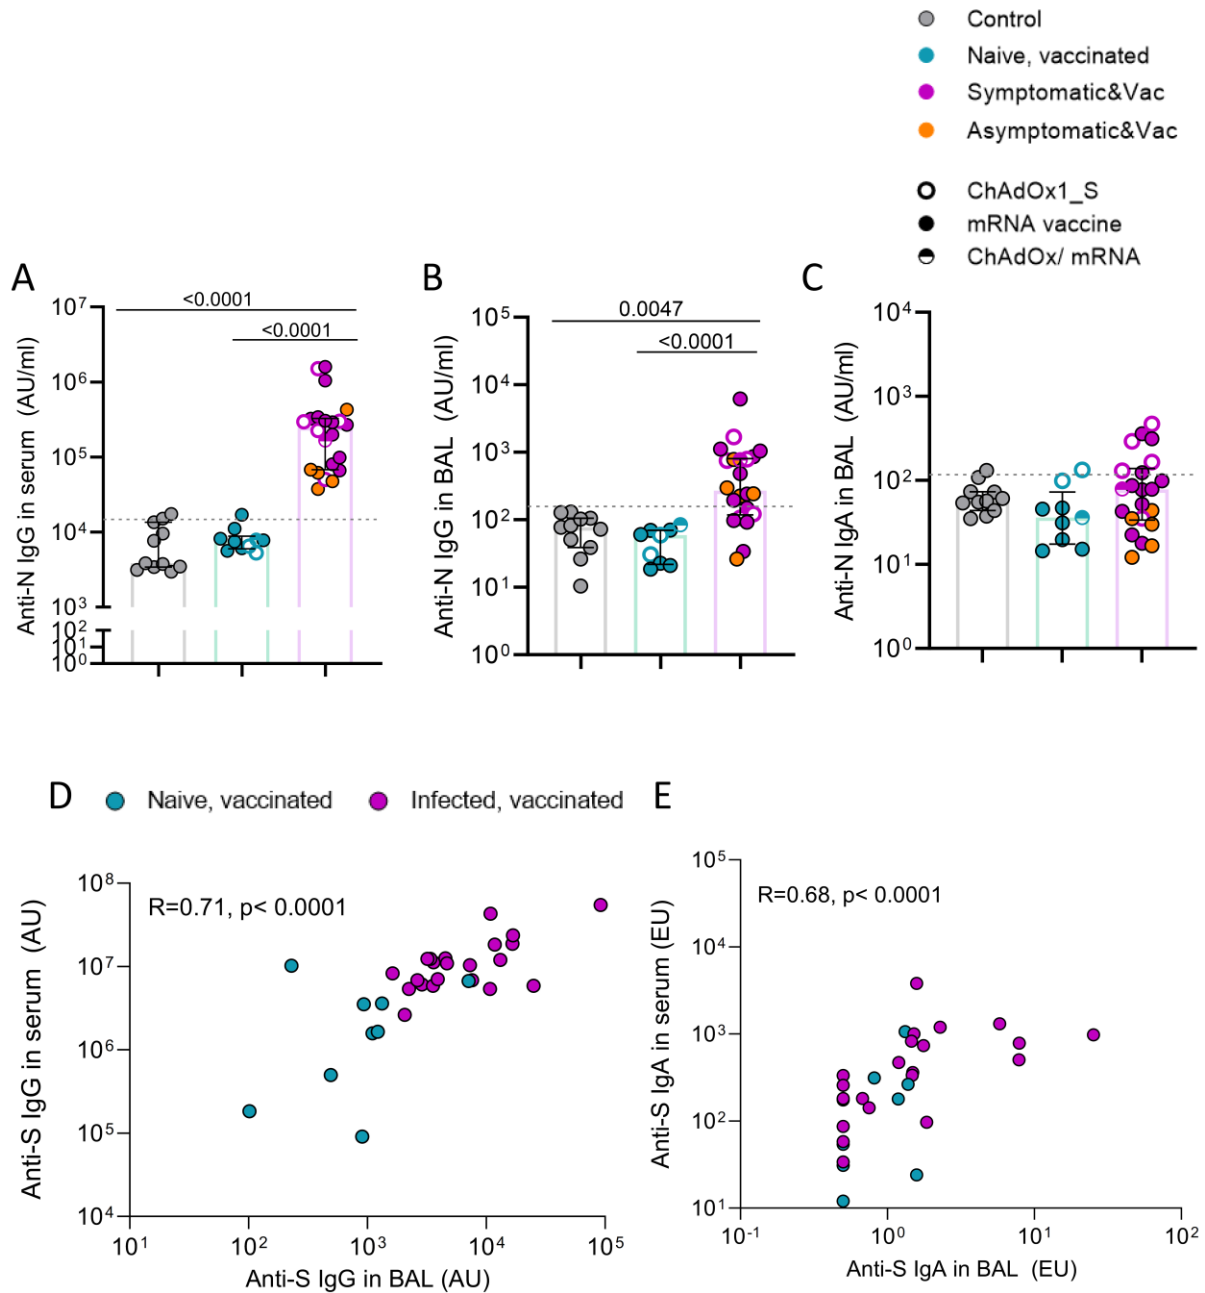

**Supplemental Figure 2. Associations between lung mucosa and systemic antibody levels against Spike post SARS-CoV-2 vaccination.** (A to C) Levels of anti-N IgG in serum (A) and anti-N IgG (B) and IgA (C) in BAL fluid of control (n=11), uninfected vaccinated (n=9) and infected vaccinated donors (n=22). The limit of assay sensitivity (LOS) per antigen is depicted with dotted black line. Data are presented as median values and interquartile ranges (IQR). Correlation of anti-S IgG (D) and anti-S IgA (E) levels measured in serum and BAL fluid of uninfected vaccinated and infected vaccinated donors. Total n=31 vaccinated individuals. R and p values are shown using two-tailed Spearman rank test. Source data are provided as a Source Data file.

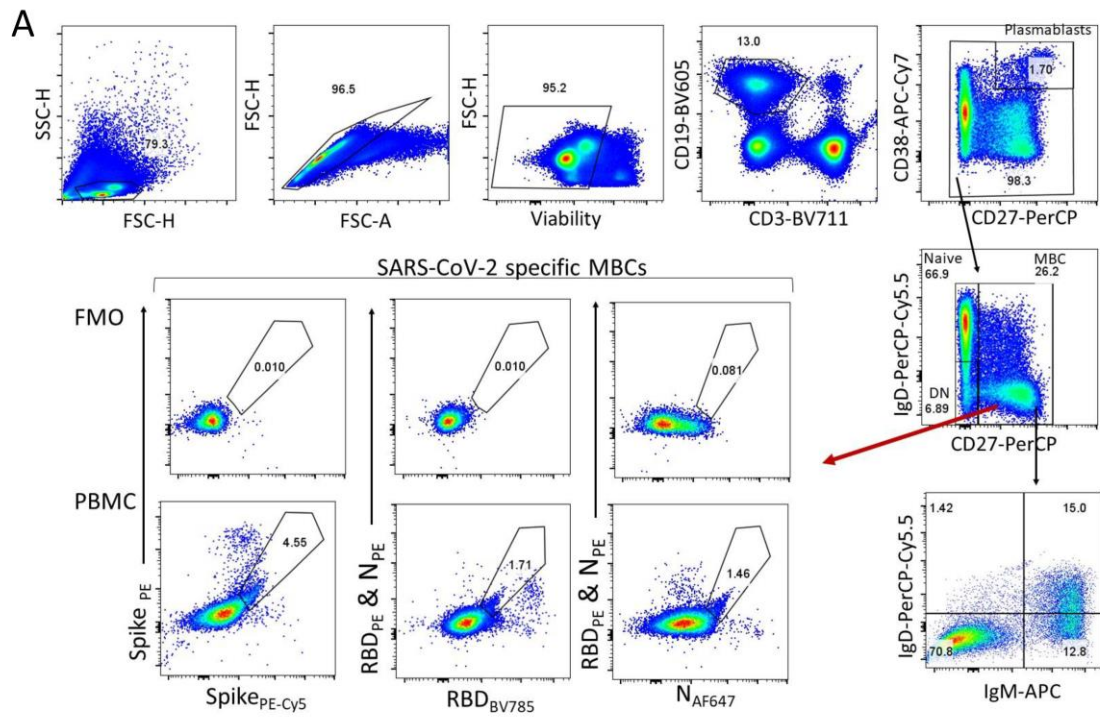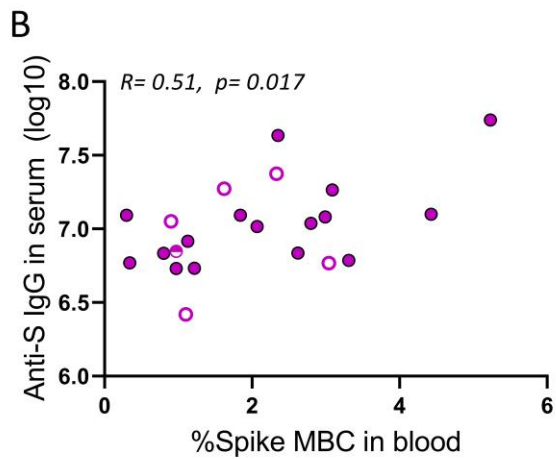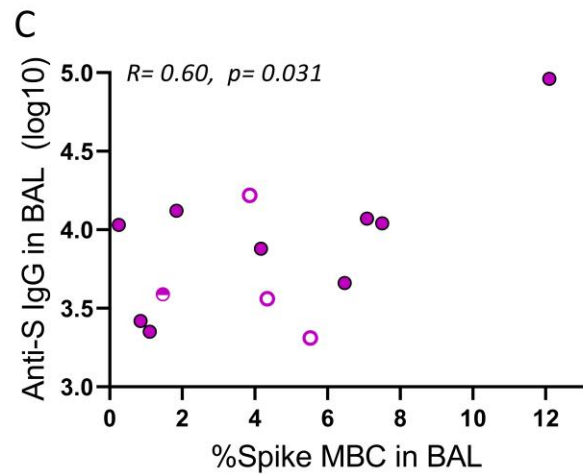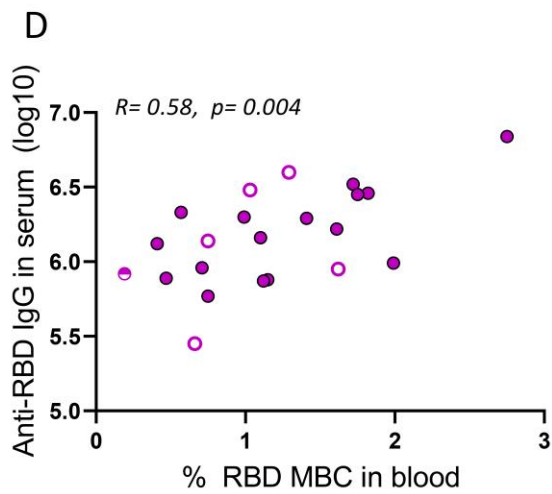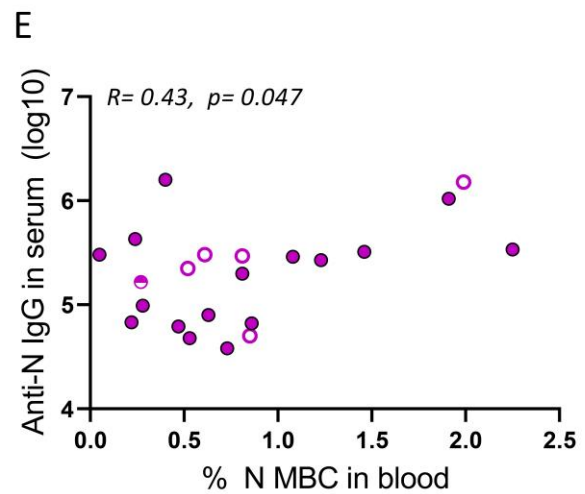

**Supplemental Figure 3. Memory B cells and SARS-CoV-2 specific B cells responses in human blood and BAL.** A) Gating strategy of B cells in human PBMC or BAL sample, with representative flow cytometry plots of SARS-CoV-2 specific B cells from controls and infected, vaccinated donors. Correlation of the frequency of Spike (B-C) memory B cells detected in blood and BAL, RBD (D) and N (E) measured in the blood with the relevant antibody levels measured in serum or BAL samples in infected vaccinated donors (n=22). Homologous vaccination with ChAdOX1\_S or mRNA vaccine is depicted with an open or close circle, respectively and heterologous vaccination with semi-full circle. R and p values are shown using two-tailed Person correlation. Source data are provided as a Source Data file.

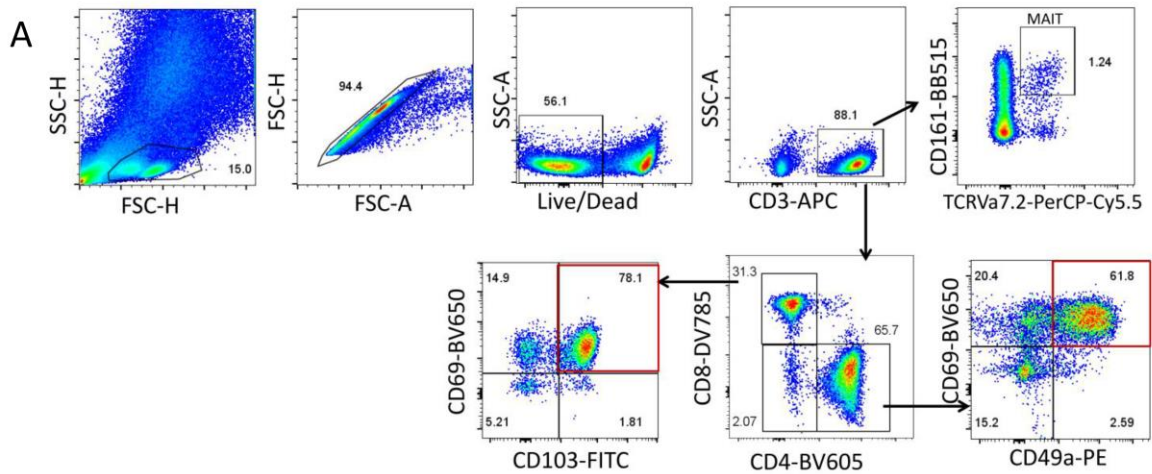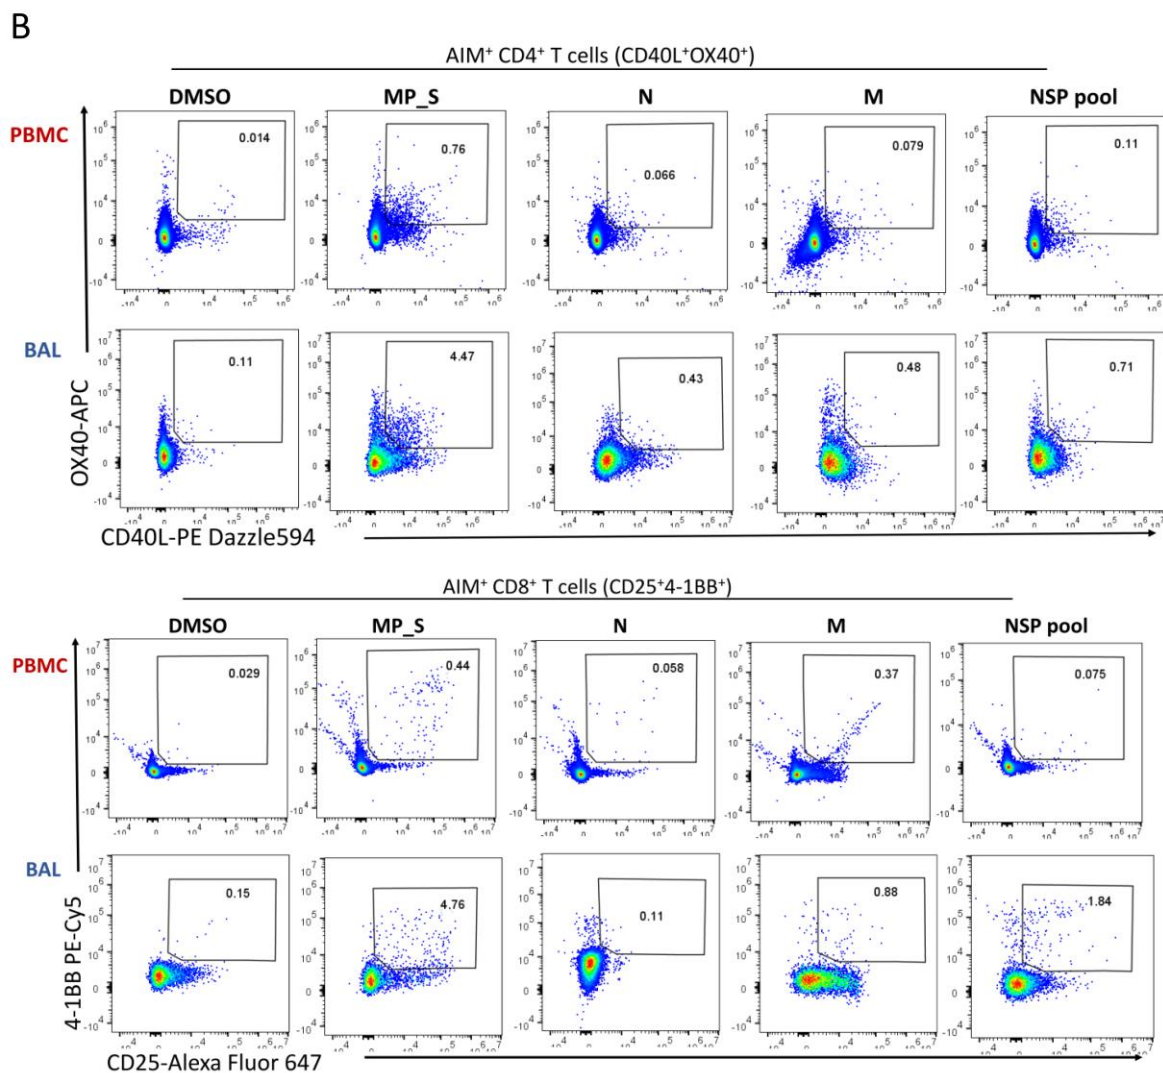

**Supplemental Figure 4. Characterisation of T cell populations in blood and bronchoalveolar lavage.**  
 A) Example gating of T cell staining after overnight stimulation with SARS-CoV-2 peptide pools. Lymphocytes (SSC-H vs. FSC-H), single cells (FSC-H vs. FSC-A), Live cells (fixable live/dead), CD3<sup>+</sup>, CD4<sup>+</sup> or CD8<sup>+</sup> or MAIT cells. Tissue resident memory (TRM) CD4<sup>+</sup> and CD8<sup>+</sup> T cells were defined as CD4<sup>+</sup>CD69<sup>+</sup>CD49a<sup>+</sup> and CD8<sup>+</sup>CD69<sup>+</sup>CD103<sup>+</sup>, respectively. B) Representative plots of SARS-CoV-2 specific

CD4<sup>+</sup> and CD8<sup>+</sup> T cells in PBMC and BAL of an infected, vaccinated donor after overnight stimulation with SARS-CoV-2 peptide pools. DMSO was used as a negative control.

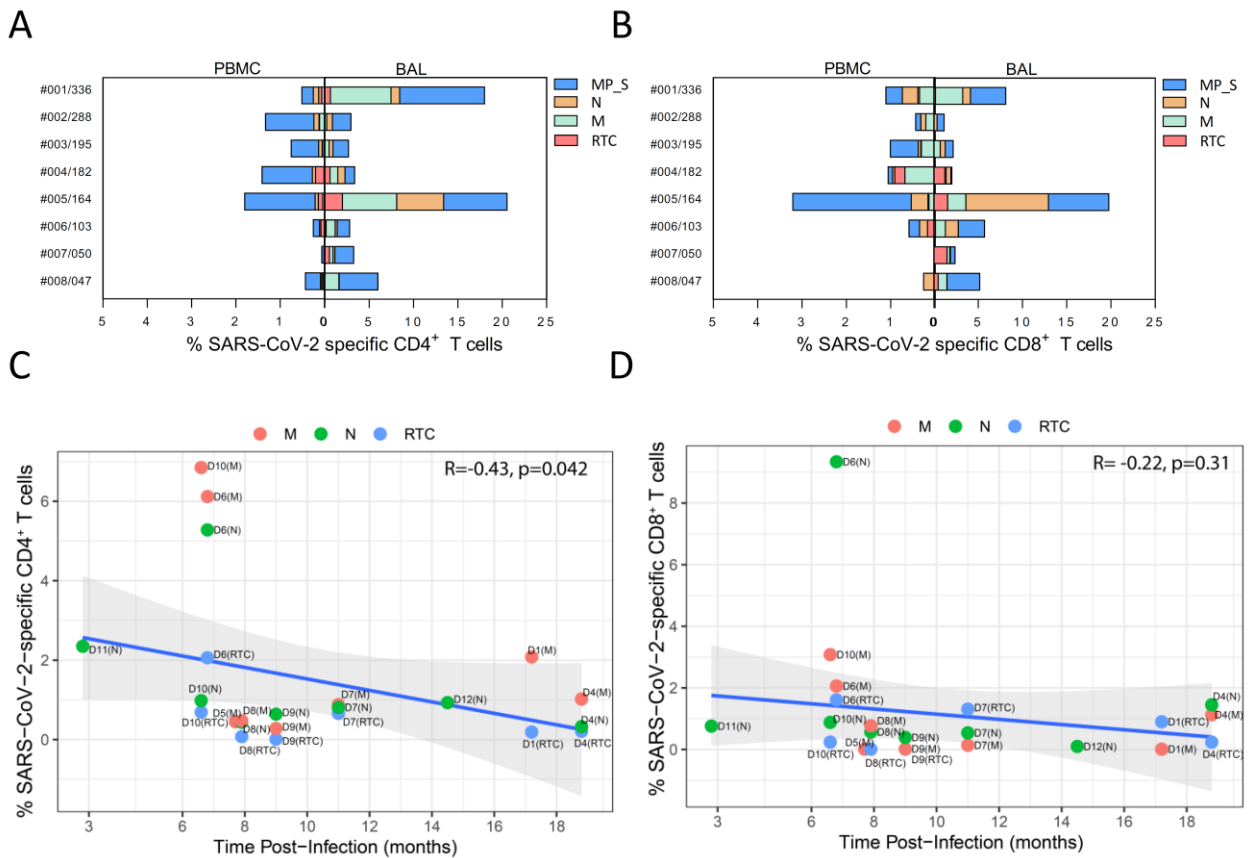

**Supplemental Figure 5. T cell specificities hierarchy in blood and lung mucosa and kinetics over time.**

A-B) Paired analysis of proportions of CD4<sup>+</sup> and CD8<sup>+</sup> T cells which recognise SARS-CoV-2 antigens in BAL and paired blood. Statistical differences were determined by two-sided Mann-Whitney U test. \*( $p < 0.05$ ). C-D) Correlation between time post infection from symptoms onset and the frequency of N-, M- and RTC- specific CD4<sup>+</sup> (C) and CD8<sup>+</sup> T cells (D) detected in BAL of infected vaccinated individuals with symptomatic, PCR-confirmed SARS-CoV-2 infection (n=12). Results of two-tailed Spearman correlation test and linear regression line with 95% confidence interval (grey shading) are shown. Source data are provided as a Source Data file.

| Marker        | Fluorochrome | Clone  | Provider       | Reference  | Dilution |
|---------------|--------------|--------|----------------|------------|----------|
| CD21          | SB436        | HB5    | Thermofisher   | 62-0219-42 | 1/33     |
| CD95 (Fas)    | BV421        | DX2    | Biolegend      | 305624     | 1/33     |
| CD11c         | Pacific Blue | Bu15   | Biolegend      | 337212     | 1/20     |
| CD185 (CXCR5) | BV480        | RF8B2  | BD Biosciences | 566142     | 1/33     |
| CD19          | BV605        | H1B19  | Biolegend      | 302244     | 1/20     |
| CD20          | BV650        | 2H7    | Biolegend      | 302336     | 1/20     |
| CD3           | BV711        | SK7    | Biolegend      | 344838     | 1/33     |
| CD27          | PE-eFluor610 | O323   | Thermofisher   | 61-0279-42 | 1/33     |
| CD24          | FITC         | ML5    | Biolegend      | 311104     | 1/33     |
| IgD           | PerCPy5.5    | IA6-2  | Biolegend      | 348208     | 1/33     |
| CCR10         | PECy7        | 13E11  | Biolegend      | 362108     | 1/20     |
| IgM           | APC          | SA-DA4 | ThermoFisher   | 17-9998-42 | 1/33     |
| CD71          | AF700        | M-A712 | BD Biosciences | 563769     | 1/33     |
| CD38          | APC-Cy7      | HIT2   | Biolegend      | 303534     | 1/50     |
| Live & Dead   | e506         | NA     | Thermofisher   | 65-0866-14 | 1/4      |

**Supplemental Table 1. Summary of antibody cocktail used for B cell immunophenotyping.** A multiparametric flow cytometry panel consisted of 14 monoclonal antibodies and a viability dye was used to immunophenotype global and memory B cells in blood and BAL samples from the 3 study groups. Electronic compensation was set using CompBeads (BD Biosciences), Arc beads (ThermoFisher) and using the Spectral Flow automated unmixing software (Aurora, Cytek) according to manufacturer's instructions.

| Marker        | Fluorochrome | Clone   | Provider         | Reference   | Dilution |
|---------------|--------------|---------|------------------|-------------|----------|
| CD45RA        | BV750        | H100    | BD Biosciences   | 747435      | 1/100    |
| CD197 (CCR7)  | BV480        | 3D12    | BD Biosciences   | 566099      | 1/20     |
| CD3           | APC-Cy7      | SK7     | Biolegend        | 344818      | 1/65     |
| CD4           | BV605        | SK3     | Biolegend        | 344646      | 1/33     |
| CD8           | BV785        | SK1     | Biolegend        | 344740      | 1/50     |
| CD185 (CXCR5) | SB436        | MU5UBEE | Thermofisher     | 62-9185-42  | 1/20     |
| CD183 (CXCR3) | BV510        | G025H7  | Biolegend        | 353726      | 1/33     |
| CD196 (CCR6)  | PECy7        | G034E3  | Biolegend        | 353418      | 1/33     |
| TCRVa7.2      | PerCPCy5.5   | 3C10    | Biolegend        | 351710      | 1/33     |
| CD161         | BB515        | REA631  | Miltenyi Biotech | 130-122-808 | 1/100    |
| CD69          | BV650        | FN50    | Biolegend        | 310934      | 1/33     |
| CD154 (CD40L) | PE/Dazzle594 | 24-31   | Biolegend        | 310840      | 1/100    |
| CD137 (4-1BB) | PECy5        | 4B4-1   | Biolegend        | 309808      | 1/33     |
| CD134 (OX40)  | APC          | ACT35   | Biolegend        | 350008      | 1/100    |
| CD25          | AF647        | BC96    | Biolegend        | 302617      | 1/33     |
| Live & Dead   | e506         | NA      | Thermofisher     | 65-0866-14  | 1/4      |

**Supplemental Table 2.** Summary of antibody cocktail used for T cell immunophenotyping and identification of antigen-specific T cells in blood using AIM assay.



| Marker        | Fluorochrome | Clone    | Provider         | Reference   | Dilution |
|---------------|--------------|----------|------------------|-------------|----------|
| CD45          | BV750        | HI30     | BD Biosciences   | 747321      | 1/100    |
| CD3           | APC-Cy7      | SK7      | Biolegend        | 344818      | 1/65     |
| CD4           | BV605        | SK3      | Biolegend        | 344646      | 1/33     |
| CD8           | BV785        | SK1      | Biolegend        | 344740      | 1/50     |
| CD183 (CXCR3) | BV510        | G025H7   | Biolegend        | 353726      | 1/33     |
| TCRVa7.2      | PerCPy5.5    | 3C10     | Biolegend        | 351710      | 1/33     |
| CD161         | BB515        | REA631   | Miltenyi Biotech | 130-122-808 | 1/100    |
| CD69          | BV650        | FN50     | Biolegend        | 310934      | 1/33     |
| CD103         | FITC         | Ber-ACT8 | Biolegend        | 350204      | 1/33     |
| CD49a         | PE           | TS2/7    | Biolegend        | 328304      | 1/100    |
| CD154 (CD40L) | PE/Dazzle594 | 24-31    | Biolegend        | 310840      | 1/100    |
| CD137 (4-1BB) | PECy5        | 4B4-1    | Biolegend        | 309808      | 1/33     |
| CD134 (OX40)  | APC          | ACT35    | Biolegend        | 350008      | 1/100    |
| CD25          | AF647        | BC96     | Biolegend        | 302617      | 1/33     |
| Live & Dead   | e506         | NA       | Thermofisher     | 65-0866-14  | 1/4      |

**Supplemental Table 3.** Summary of antibody cocktail used for T cell immunophenotyping and identification of antigen-specific T cells in BAL using AIM assay.
